# Supplementary material for: Production of partially reduced graphene oxide nanosheets using a seaweed sap
Source: Royal Society of Chemistry journal article supplement (doi:10.1039/c4ra13149e), 2014-01-01
Supplement: c4ra13149e1.pdf [file c4ra13149e1.pdf]

[Electronic Supporting information](#)

**Production of partially reduced graphene oxide nanosheets using a seaweed sap**

Mukesh Sharma, Dibyendu Mondal, Arun Kumar Das & Kamallesh Prasad\*

<sup>a</sup> *AcSIR- Central Salt & Marine Chemicals Research Institute, G. B Marg, Bhavnagar-364002 (Gujarat), India*

<sup>b</sup> *Marine Biotechnology and Ecology Discipline, CSIR-Central Salt & Marine Chemicals Research Institute, G. B Marg, Bhavnagar-364002 (Gujarat), India, Phone No : +91-278-2567760. Fax No. +91-278-256756; Email: kamlesh@csmcri.org / drkamaleshp@gmail.com]*

<sup>c</sup> *Analytical Discipline & Centralized Instrument Facility, CSIR-Central Salt & Marine Chemicals Research Institute, G. B Marg, Bhavnagar-364002 (Gujarat), India.*

**Table S1:** Constituent of *Kappaphycus* sap

| Sr. No. | Constituent                | Amount in ppm |
|---------|----------------------------|---------------|
| 1       | Indole 3-acetic acid (IAA) | 26.52         |
| 2       | Zeatin                     | 19.65         |
| 3       | GA <sub>3</sub>            | 23.65         |
| 4       | Choline                    | 57.30         |
| 5       | Glycine betaine            | 79.33         |
| 6       | Betain aldehyde            | present       |
| 7       | Na <sup>+</sup>            | 198.0         |
| 8       | K <sup>+</sup>             | 33654         |
| 9       | Ca <sup>2+</sup>           | 321.0         |
| 10      | Mg <sup>2+</sup>           | 1112.0        |
| 11      | Zn <sup>2+</sup>           | 4.7           |
| 12      | Fe <sup>2+</sup>           | 86.1          |
| 13      | P <sup>3+</sup>            | 17.45         |

### Preparation of Plant growth hormone + flavonol free sap

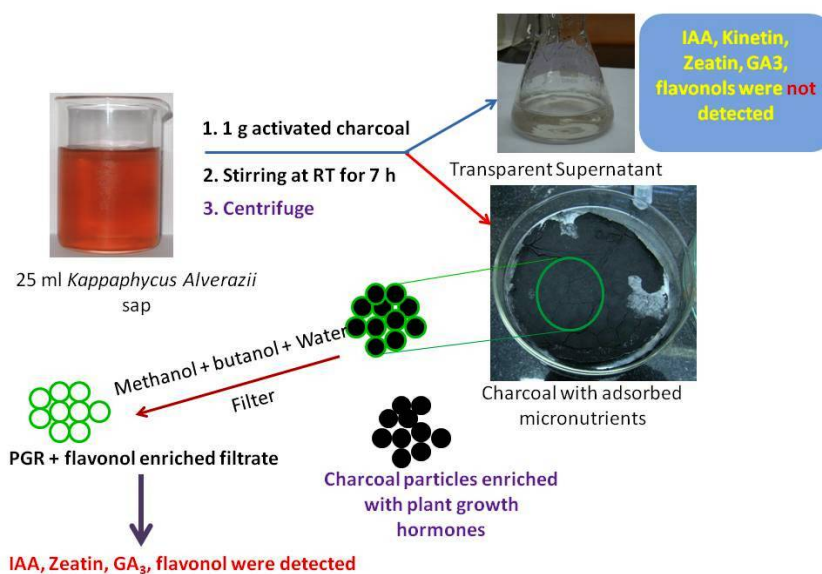

**Scheme S1:** Preparation of plant growth hormone and flavonol free sap (2).

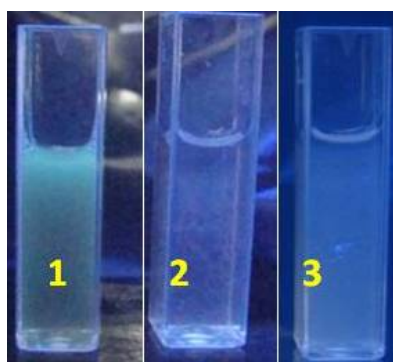

**Figure S1:** Qualitative phytochemical analysis of the sap to detect flavonols in the sap samples 1. pure sap. 2. Sap obtained after charcoal treatment and 3. Sap consisting of only metal salts

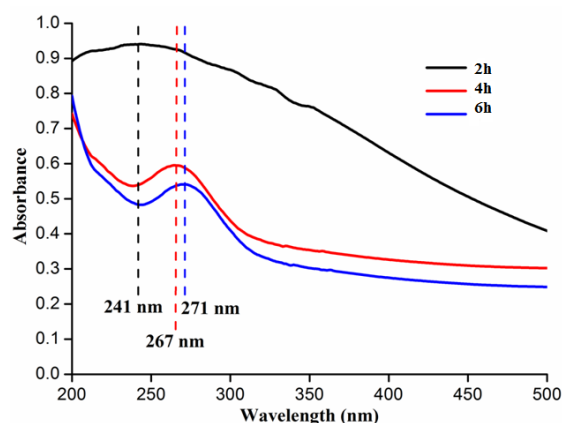

**Figure S2:** UV-Vis spectra of pure K-sap reduced GO with different reaction time. All spectra were recorded under similar dilution (50 µg/ml).

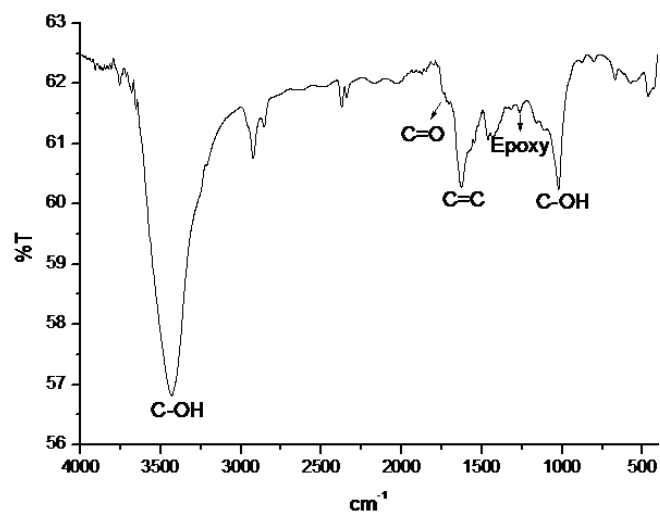

**Figure S3:** FT-IR spectra of reduced GO using K-sap (3).

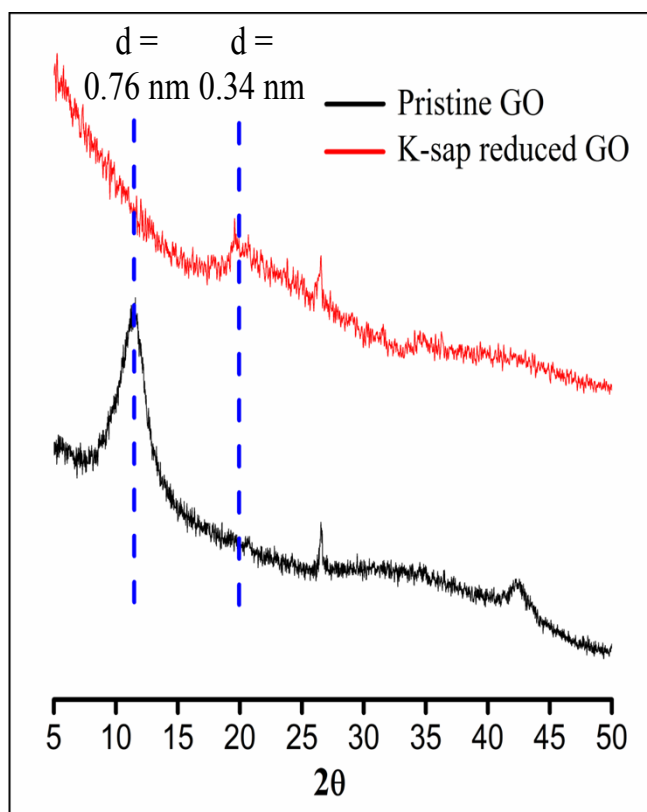

**Figure S4:** Powder X-ray diffraction pattern of pristine GO (black) and GO reduced by 1 (red).

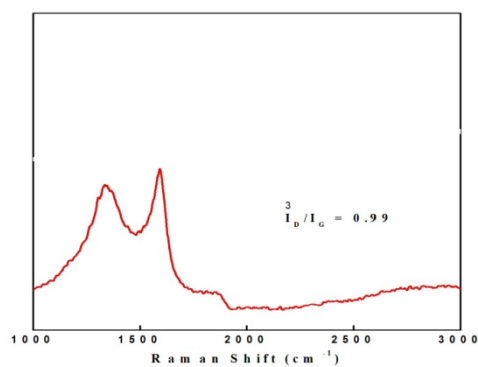

**Figure S5:** Raman spectra of GO reduced by K-Sap (3)

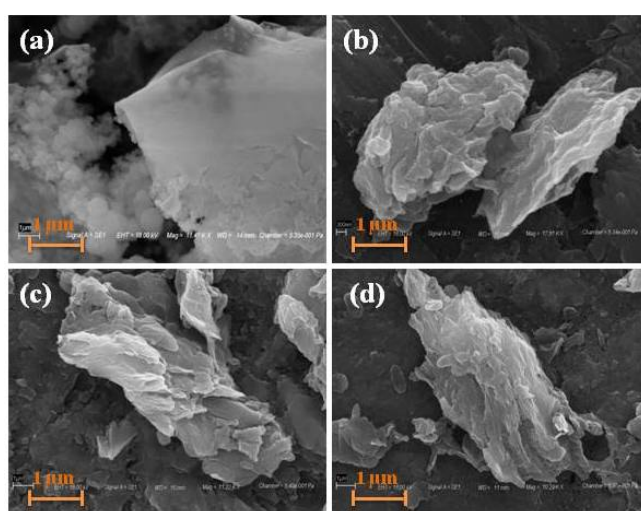

**Figure S6:** SEM images of (a) HGO and reduced GO with (b) pristine *K*-sap (1), (c) charcoal treated *K*-sap (2) and (d) *K*-sap containing only metal salts (3).

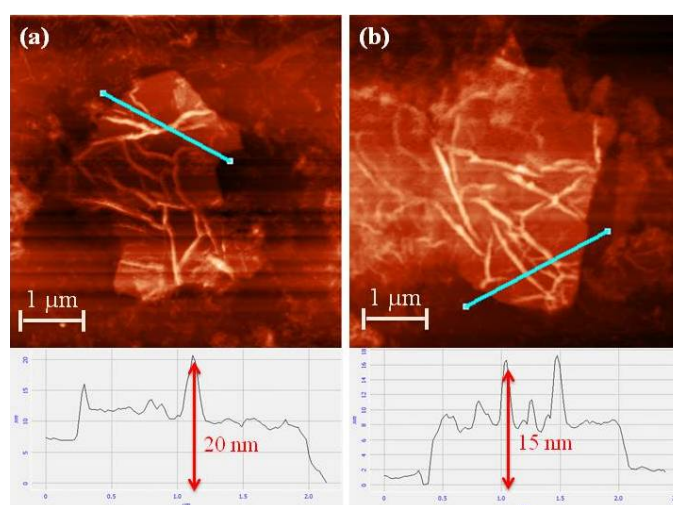

**Figure S7:** AFM images of (a) Pristine HGO and (b) reduced GO with pristine *k*-sap.

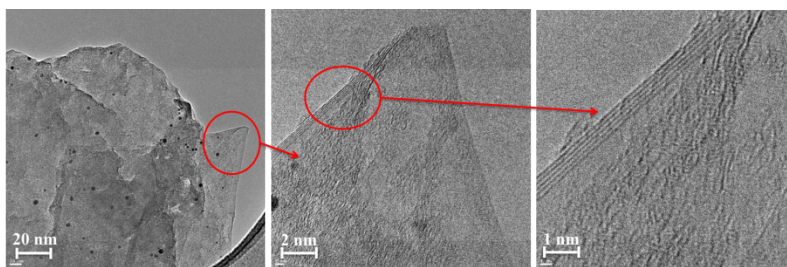

**Figure S8.** HR-TEM image of reduced GO obtained using K-sap (3).

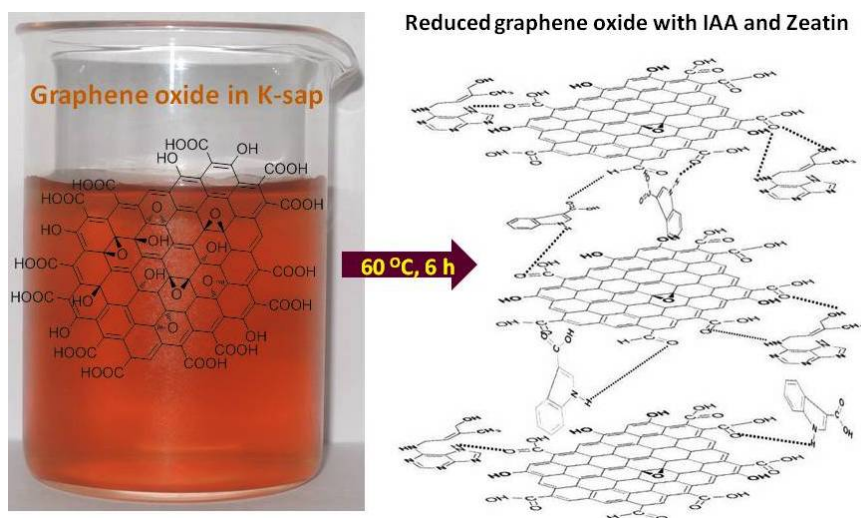

**Scheme S2:** Selective partition of plant growth regulators in GO reduced using K-sap (1).

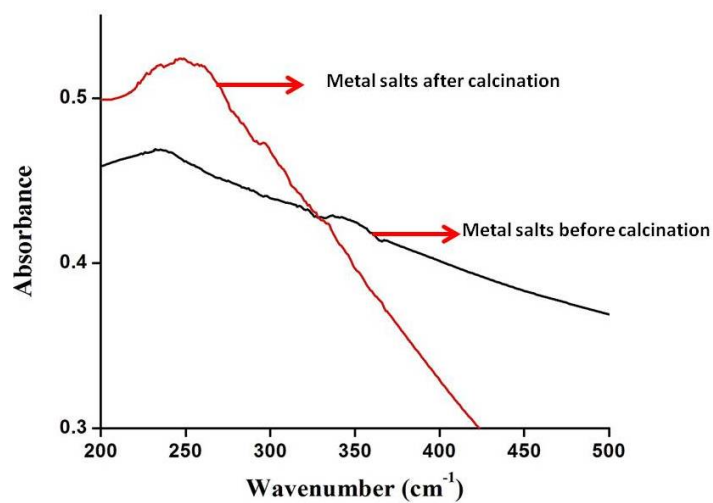

**Figure S9:** UV-Vis of GO reduced using mixture of metal salts pre and post calcination

**Table S1:** Constituent of *Kappaphycus* sap after the recovery of rGO

| Sr. No. | Constituent                | Amount in ppm |
|---------|----------------------------|---------------|
| 1       | Indole 3-acetic acid (IAA) | 19.00         |
| 2       | Zeatin                     | 11.65         |
| 3       | GA <sub>3</sub>            | 14.11         |
| 4       | Choline                    | 58.00         |
| 5       | Glycine betaine            | 74.21         |
| 6       | Na <sup>+</sup>            | 191.0         |
| 7       | K <sup>+</sup>             | 33895         |
| 8       | Ca <sup>2+</sup>           | 345.0         |
| 9       | Mg <sup>2+</sup>           | 1212.0        |
| 10      | Zn <sup>2+</sup>           | 3.9           |
| 11      | Fe <sup>2+</sup>           | 90.1          |
| 12      | P <sup>3+</sup>            | 17.45         |

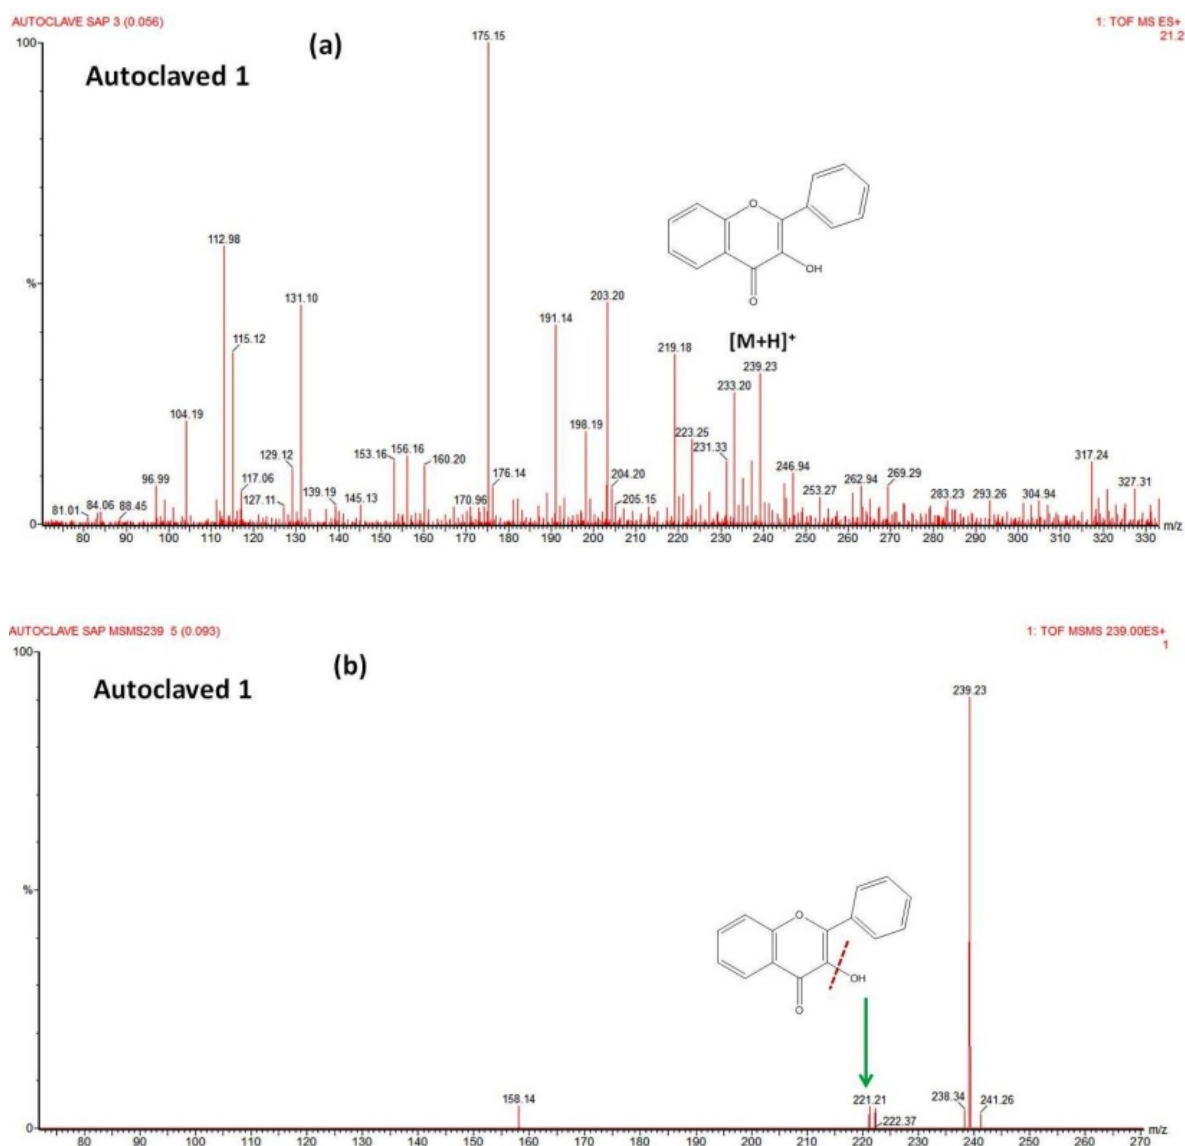

**Figure S10:** (a) ESI-MS analysis of autoclaved pristine sap (**1**) and MS/MS of m/z of 239 (b)

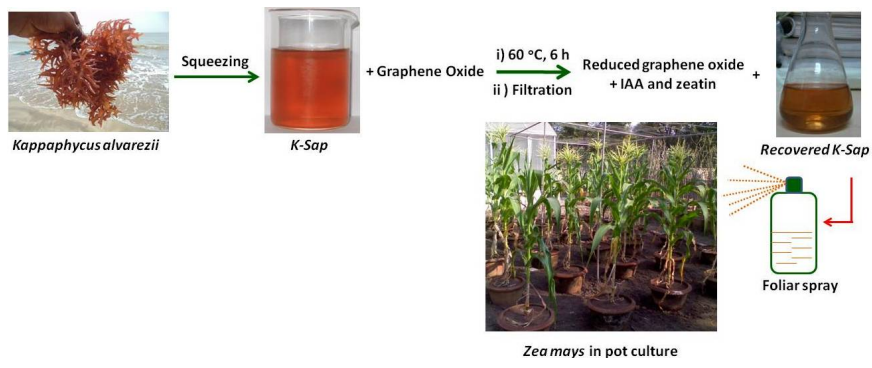

**Scheme S3:** Application of the sap as foliar spray after the recovery of rGO.
